# Supplementary material
Source: publisher figshare collection journal article supplement (https://gsajournals.figshare.com/ndownloader/files/22423686)
Supplement: Supplementary file 1 [file 22423686]

**Table S2. Primers for circRNA validation and circRNA and parental gene quantification.**

| CircRNA ID | Primer ID* | Expected PCR Product Size (bp) | Tm | Primer (5'-3') | Parental gene | Note |
| --- | --- | --- | --- | --- | --- | --- |
| circRNA213 | C213F | 311 | 62.5 | CCAGTGGTGTCAATGATGAATGC | LOC111877918 |  |
| C213R | 62.5 | CGCCCTGAGTCAAGAGACAAAAT |
| D213F | 211 | 63.0 | TTCCCCAAATCTTGTAATGTGCC | Also used for qRT-PCR |
| D213R | 63.7 | AGGCATTCATCATTGACACCACTG |
| circRNA24 | C24F | 191 | 63.0 | AAAAGGACTCGTGAAGACCTACAAGATA | LOC111900783 |  |
| C24R | 63.0 | GTTAGGGGGACAAAATCAGCAAGT |
| D24F | 164 | 62.9 | TGATGGAAAAGTCTGGAGGGTTG | Also used for qRT-PCR |
| D24R | 59.4 | TCAACTCTATCTTGTAGGTCTTCACG |
| circRNA184 | C184F | 261 | 61.8 | CCTTGGATATTGCCGGAAAAA | LOC111889346 |  |
| C184R | 61.3 | TACTTCGCCACTCCTAAATCCG |
| D184F | 235 | 63.3 | CATTCATAGAAGGCACCCCCAG | Also used for qRT-PCR |
| D184R | 63.2 | TGGCTATTTTAATCCTCGTCTCCC |
| circRNA216 | C216F | 364 | 63.3 | TATCATCACTACGAATGGGCTGTTG | LOC111913013 |  |
| C216R | 64.1 | GGGAACATTCTCCATCCATCTCAA |
| D216F | 289 | 60.3 | ATTGGATGCTGCAACTGTTATTTT | Also used for qRT-PCR |
| D216R | 59.0 | GTATCAGCCACACAAAAAAAGGA |
| circRNA784 | C784F | 457 | 64.3 | ATTGTGGTTTCTACCCCAGGTGTTT | LOC111876071 |  |
| C784R | 63.7 | CAGTGAAGTTTCTTTGAGTCATTGCC |
| D784F | 267 | 60.5 | CAATGACTCAAAGAAACTTCACTGC | Also used for qRT-PCR |
| D784R | 60.4 | TCATTATCTTCATCCAGAATACCCTT |
| circRNA228 | C228F | 210 | 64.5 | AAATCCAAGAGGCATTGTCAGCAC | LOC111880154 |  |
| C228R | 64.0 | CATCTTCCTCAGCCGTGTTCTTTT |
| D228F | 176 | 64.8 | CCCTGCCGCTCCGGTACA | Also used for qRT-PCR |
| D228R | 63.9 | CTCAGTTTGCTCATTTATCTCATCCATT |
| circRNA203 | C203F | 255 | 64.2 | GGCATTATTGTTCTTGAAGGTCGTG | LOC111896959 |  |
| C203R | 64.5 | AGCCATTTGGTCTTTGGTAAGTTGAG |
| D203F | 244 | 60.1 | AATACTCAACTTACCAAAGACCAAATG | Also used for qRT-PCR |
| D203R | 59.7 | CTTCAAGAACAATAATGCCACCA |
| circRNA99 | C99F | 222 | 64.8 | GGATCTCAAGCTGCTCCTCGTGTA | LOC111916189 |  |
| C99R | 64.1 | GGGATGGACAGCTTTAATCAATGC |
| D99F | 184 | 65.7 | GGCTTGCCCTCATGTAACTGGAAT | Also used for qRT-PCR |
| D99R | 65.7 | TGGGACCTTTAGATGAAAACGATGC |
| ircRNA101 | C101F | 302 | 63.6 | CACAGTGAAGAAAAGAGTTGAGCGTT | LOC111915859 |  |
| C101R | 62.7 | GAGAGGATGATTGAGGTAGTTTATGAGG |
| D101F | 207 | 59.4 | ATAAACTACCTCAATCATCCTCTCAAG | Also used for qRT-PCR |
| D101R | 58.2 | CCATATTTTCTCCATCTGTAACCA |
| circRNA277 | C277F | 184 | 65.5 | ATAATCCCCCGCAACACACACC | LOC111895324 |  |
| C277R | 64.0 | AGTGAGAACAGCGTGGAGGTCG |
| D277F | 180 | 62.7 | ACCTCCACGCTGTTCTCACTGTT | Also used for qRT-PCR |
| D277R | 62.2 | TGATCCATTGTTTCGGGTTCTG |
| Parental gene | Primer ID* | Expected PCR Product Size (bp) | Tm | Primer (5'-3') | CircRNA ID | Note |
| LOC111877918 | 918F | 217 | 66.6 | GTTAGGCTTACGCCCAAACTCCATC | circRNA213 | used for qRT-PCR |
| 918R | 66.6 | GGAAACACCATCCTTTTTTGCTTGAG |
| LOC111900783 | 783F | 194 | 62.0 | AAAAAGGACTCGTGAAGACCTACAAG | circRNA24 | used for qRT-PCR |
| 783R | 62.9 | CATACAACAGCATCAATAACAGGGC |
| LOC111889346 | 346F | 206 | 61.5 | GCATCTCTTCAGGGGTAAGTATCTAAA | circRNA184 | used for qRT-PCR |
| 346R | 60.6 | CCTGTGAATGACATTATTGGCG |
| LOC111913013 | 013F | 157 | 62.9 | CGGATTGTGTCTCTTGTTACCTGC | circRNA216 | used for qRT-PCR |
| 013R | 61.7 | CACTTCCTTTTTTTGTGTGGCTG |
| LOC111876071 | 071F | 190 | 65.2 | TGGTGCCAAAATGGTGAAGGTTAG | circRNA784 | used for qRT-PCR |
| 071R | 64.6 | AAGGCTTCTTCAAAGTTGCTATGTATCC |
| LOC111880154 | 154F | 242 | 65.4 | TGATGTTGACAAGACAATGGATGAGATAA | circRNA228 | used for qRT-PCR |
| 154R | 65.5 | GCTCTGCTCCTTCAAGTTCTTCCAA |
| LOC111896959 | 959F | 176 | 61.4 | AAGAATGGGTCCCACCTGAAAT | circRNA203 | used for qRT-PCR |
| 959R | 62.2 | CCTGTCAAAAGTCAAGGGAAGTCTAC |
| LOC111916189 | 189F | 297 | 61.7 | ATTTGTTGCTATTATGGACGAGGAA | circRNA99 | used for qRT-PCR |
| 189R | 61.4 | ATCGTTTTCATCTAAAGGTCCCAA |
| LOC111915859 | 859F | 307 | 63.7 | ATCTTGAGAGGATGATTGAGGTAGTTTATG | circRNA101 | used for qRT-PCR |
| 859R | 63.6 | CACAGTGAAGAAAAGAGTTGAGCGTT |
| LOC111895324 | 324F | 190 | 65.0 | TAATCCCCCGCAACACACACC | circRNA277 | used for qRT-PCR |
| 324R | 65.2 | ATAGAACAGTGAGAACAGCGTGGAGG |

* C and D indicate convergent and divergent primers.
